# Supplementary material for: Integration of Tmc1/2 into the mechanotransduction complex in zebrafish hair cells is regulated by Transmembrane O-methyltransferase (Tomt)
Source: PubMed Central journal article supplement (PMC5462536; doi:10.7554/elife.28474), 2017-05-23
Supplement: elife-28474-supp1.pdf [file elife-28474-supp1.pdf]

### Supplemental File 1A. Primer sequences

Sequences of primers used in this study for cloning, genotyping, mutagenesis, and RT-PCR. Where relevant, gene specific sequences are underlined.

| Primer name                  | Purpose                                                            | Sequence                                                                                             |
|------------------------------|--------------------------------------------------------------------|------------------------------------------------------------------------------------------------------|
| <b>Gateway primers</b>       |                                                                    |                                                                                                      |
| attB1F-comta                 | pDONR221-comta(NS)                                                 | GGGGACAAGTTTGTACAAAAAAGCAGGCTgcaaacATGCTGTGGGTTGTGTTGGC                                              |
| attB1F-HA-GGSG-tomt_45-259   | pDONR221-HA-tomt_45-259(NS)                                        | GGGGACAAGTTTGTACAAAAAAGCAGGCTgcaaacATGTACCCATACGATGTTCCAGATTACGCT<br>gggtggtctggtAGTCGAGAGGGAACGGGCC |
| attB1F-mgat1a_1-110          | pDONR221-mgat1a_1-110(NS)                                          | GGGGACAAGTTTGTACAAAAAAGCAGGCTgcaaacATGCTCCGCAAGAGAAGTCCTC                                            |
| attB1F-Mmu.Tomt              | pDONR221-Mmu.Tomt(NS)                                              | GGGGACAAGTTTGTACAAAAAAGCAGGCTgcaaacATGTCCCCTGCCATTGC                                                 |
| attB1F-tmie                  | pDONR221-tmie-HA                                                   | GGGGACAAGTTTGTACAAAAAAGCAGGCTgtaaacATGAGACGCGGGAGAAGAAG                                              |
| attB1F-tomt                  | pDONR221-tomt(NS); pDONR221-tomt-HA; pDONR221-tomt_1-45(NS)        | GGGGACAAGTTTGTACAAAAAAGCAGGCTAAACATGGTATCTCCTGCGATCGC                                                |
| attB2F-lhfp15a               | pDONR P2R-P3-lhfp15a                                               | GGGGACAGCTTCTTGTACAAAGTGGCGATGGCGAAAATGCTATCTGCC                                                     |
| attB2R-comta                 | pDONR221-comta(NS)                                                 | GGGGACCACCTTTGTACAAGAAAGCTGGGTcTCCTAAGAAGACCGATTTCTCCAG                                              |
| attB2R-HA+st                 | pDONR221-tmie-HA; pDONR221-tomt-HA                                 | GGGGACCACCTTTGTACAAGAAAGCTGGGTcttaAGCGTAATCTGGAACATCGTATGG                                           |
| attB2R-mgat1a_1-110          | pDONR221-mgat1a_1-110(NS)                                          | GGGGACCACCTTTGTACAAGAAAGCTGGGTcCGGAGCTGTGTGTTCAACTTCTG                                               |
| attB2R-Mmu.Tomt              | pDONR221-Mmu.Tomt(NS)                                              | GGGGACCACCTTTGTACAAGAAAGCTGGGTcGCCGGTCCAGTATAGGTG                                                    |
| attB2R-tomt                  | pDONR221-tomt(NS); pDONR221-HA-tomt_45-259(NS)                     | GGGGACCACCTTTGTACAAGAAAGCTGGGTcCCTTGATGCCGATGTAAGTGAGC                                               |
| attb2r-tomt_1-45             | pDONR221-tomt_1-45(NS)                                             | GGGGACCACCTTTGTACAAGAAAGCTGGGTcACTGATGCCCGATAAACAGTCC                                                |
| attB3R-lhfp15a               | pDONR P2R-P3-lhfp15a                                               | GGGGACAACCTTTGTATAATAAAGTTGGTCATGCTTCCTCTTCTTCTC                                                     |
| <b>Cloning and RT-PCR</b>    |                                                                    |                                                                                                      |
| lrrc51_ORF-F                 | RT-PCR for lrrc51                                                  | CATGTTCCGGATCTTCAGTGGAC                                                                              |
| lrrc51_ORF-R                 | RT-PCR for lrrc51                                                  | TCAGTCTGATTTGCTGTAACTGTG                                                                             |
| Mmu.Tomt_H183A-F             | Site directed mutagenesis to make pDONR221-Mmu.Tomt_H183A          | CCGAGGTCGGGCTGCCAGGAGCACCAGATCT                                                                      |
| Mmu.Tomt_H183A-R             | Site directed mutagenesis to make pDONR221-Mmu.Tomt_H183A          | AGATCTGGTGCTCCTGGCAGCCCGACCTCGG                                                                      |
| pcdh15a <sup>th263b</sup> -F | genotyping pcdh15a <sup>th263b</sup>                               | AGGGACTAAGCCGAAGGAAG                                                                                 |
| pcdh15a <sup>th263b</sup> -R | genotyping pcdh15a <sup>th263b</sup>                               | TCCGGCTGTA AACATCAGC                                                                                 |
| tmc2b <sup>sa8817</sup> -F   | genotyping tmc2b <sup>sa8817</sup>                                 | CAAGTTATGAAATCATTAAAGTCACTCTG                                                                        |
| tmc2b <sup>sa8817</sup> -R   | genotyping tmc2b <sup>sa8817</sup>                                 | AAGAACTTAAACAGTGAACATAATGTTGTA                                                                       |
| tmie-F                       | clone tmie ORF                                                     | gtaaacATGAGACGCGGGAGAAGAAG                                                                           |
| tmie-HA-R                    | clone tmie ORF C-terminally tagged with an HA epitope (lowercase)  | agcgtaatctggaacatcgatgggtaacctccaccTTTCTTCGAGGCTTCTTGGC                                              |
| tmie-R                       | clone tmie ORF                                                     | TCATTTCTTCGAGGCTTCTTG                                                                                |
| tomt_exon1-F                 | genotyping tomt <sup>tk256c</sup> and tomt <sup>nl16</sup> alleles | TGTGTATTGCAGGTCAGTGTG                                                                                |
| tomt_exon1-R                 | genotyping tomt <sup>tk256c</sup> and tomt <sup>nl16</sup> alleles | AAGCGTTTTTCTGGGTGTTG                                                                                 |
| tomt_ORF-F                   | RT-PCR for tomt                                                    | GTGTATTGCAGGTCAGTGTGGAAG                                                                             |
| tomt_ORF-R                   | RT-PCR for tomt                                                    | GCCATATAAATGTGAGCAATGATG                                                                             |
| tomt-HA-R                    | clone tomt ORF C-terminally tagged with an HA epitope (lowercase)  | agcgtaatctggaacatcgatgggtaacctccaccCTTGATGCCGATGTAAGTGAGC                                            |
| NheI-kozak-Mm-Tomt           | clone mouse Tomt into pcDNA3.1+                                    | cacaGCTAGCgccaccATGTCCCCTGCCATTGC                                                                    |
| XhoI-Mm-Tomt-HA              | clone mouse Tomt-HA into pcDNA3.1+                                 | cacaCTCGAGtcaagcgtaatctggaacatcgatgggtaacctccaccGCCGGTCCAGTATAGGTGAG                                 |
| NheI-kozak-Mm_Comt           | clone mouse Comt into pcDNA3.1+                                    | cacaGCTAGCgccaccATGCTGTTGGCTGCTGTCT                                                                  |
| XhoI-Mm-Comt-HA              | clone mouse Comt-HA into pcDNA3.1+                                 | cacaCTCGAGtcaagcgtaatctggaacatcgatgggtaacctccaccGGACTTCACGGGGCTG                                     |

## Supplemental File 1B. Expression constructs generated for this study

### Gateway entry vectors

|                             |
|-----------------------------|
| pDONR221-tomt(NS)           |
| pDONR221-tomt-HA            |
| pDONR221-tomt_1-45(NS)      |
| pDONR221-HA-tomt_45-259(NS) |
| pDONR221-mgat1a_1-110(NS)   |
| pDONR221-comta(NS)          |
| pDONR221-Mmu.Tomt(NS)       |
| pDONR221-Mmu.Tomt_H183A(NS) |
| pDONR221-tmie-HA            |
| pDONR221-tmc2b-GFP          |
| pDONR221-tmc1-GFP           |
| pDONR P2R-P3-lhfp15a        |

### Expression constructs

|                                     |
|-------------------------------------|
| pDESTCG2-myo6b:tomt-GFP             |
| pDESTCG2-hsp70l:tomt-emGFP          |
| pDESTCG2-myo6b:tomt-HA-pA           |
| pDESTCG2-myo6b:Mmu.Tomt-emGFP       |
| pDESTCG2-myo6b:Mmu.Tomt_H183A-emGFP |
| pDESTCG2-myo6b:comta-emGFP          |
| pDESTCG2-myo6b:tomt_1-45-emGFP      |
| pDESTCG2-myo6b:mgat1a_1-110-mKate2  |
| pDESTCG2-myo6b:GFP-lhfp15a          |
| pDESTCG2-myo6b:tmie-HA-pA           |
| pDESTCG2-myo6b:tmc2b-GFP-pA         |
| pDESTCR-myo6b:tmc1-GFP-pA           |
| pDESTCR-myo6b:tomt-p2a-nls-mCherry  |
| pDESTCG2-myo6b:HA-tomt_45-259-emGFP |
| pDESTCG2-myo6b:mKate2-KDEL-pA       |
| pcDNA3.1+Tomt-HA                    |
| pcDNA3.1+Tomt(H183A)-HA             |
| pcDNA3.1+Comt-HA                    |

## Supplemental File 1C. Stable transgenic lines generated for this study

| Transgenic Fish Lines          |
|--------------------------------|
| Tg(hsp70l:tomt-emGFP)          |
| Tg(myo6b:comta-emGFP)          |
| Tg(myo6b:GFP-lhfpl5a)          |
| Tg(myo6b:mgat1a_1-110-mKate2)  |
| Tg(myo6b:Mmu.Tomt_H183A-emGFP) |
| Tg(myo6b:Mmu.Tomt-emGFP)       |
| Tg(myo6b:tmc1-GFP-pA)          |
| Tg(myo6b:tmc2b-GFP-pA)         |
| Tg(myo6b:tmie-HA-pA)           |
| Tg(myo6b:tomt_1-45-emGFP)      |
| Tg(myo6b:tomt-GFP)             |
| Tg(myo6b:tomt-HA-pA)*          |

Single copy of transgene unless noted with an \*
